# Supplementary material
Source: publisher figshare collection journal article supplement (https://acs.figshare.com/ndownloader/files/3924019)

## Supporting Information

### The gluten biopolymer and nano-clay derived structures in wheat gluten-urea-clay composites; barrier and mechanical properties

*Ramune Kuktaite<sup>a\*</sup>, Hasan Türe<sup>b</sup>, Mikael S. Hedenqvist<sup>b</sup>, Mikael Gällstedt<sup>c</sup> and Tomás S. Plivelic<sup>d</sup>*

a, Department of Plant Breeding, The Swedish University of Agricultural Sciences, SE-230 53 Alnarp, Sweden

b, KTH Royal Institute of Technology, School of Chemical Science and Engineering, Fibre and Polymer Technology, Royal Institute of Technology, SE-10044 Stockholm, Sweden

c, Innventia, Box 5604, 11486 Stockholm, Sweden

d, MAX IV Laboratory, Lund University, Box 118, SE-22100 Lund, Sweden

Present address for Hasan Türe: Ordu University, Faculty of Marine Sciences, Department of Marine Science and Technology Engineering, 52400, Fatsa, Ordu, Turkey

Corresponding author's \* e-mail: ramune.kuktaite@slu.se. Phone: +46 40 415337.

This Supported Information contains:

- **Table S1**, detailing tensile properties of WGG and WGG-5%C15A composites injection molded at 170, 180 and 190° C at transverse- and radial- directions.
- **Table S2**, detailing glass transition temperature of WGG and WGG-5%C15A composites injection molded at 170, 180 and 190° C.
- **Figure S1**, depicting SAXS patterns of C15A clay composites indicating the first Bragg peak from the HCP structure.
- **Figure S2**, depicting WAXS patterns of 1, 3 and 5 wt.% natural MMT and C15A composites.
- Two figures, two tables and in total 4 pages.

**Table S1.** Tensile properties of WGG and WGG-5%C15A composites injection molded at 170, 180 and 190° C: a) transverse direction; b) radial direction.

a)

| Mechanical properties of the samples in transverse direction (TD) |                 |                  |                     |
|-------------------------------------------------------------------|-----------------|------------------|---------------------|
| Sample <sup>1</sup>                                               | E-modulus (Mpa) | Max stress (MPa) | Strain at break (%) |
| WGG-170                                                           | 21 ± 5          | 1.5 ± 0.3        | 21.2 ± 9.6          |
| WGG-180                                                           | 28 ± 2          | 1.9 ± 0.3        | 14.7 ± 4.3          |
| WGG-190                                                           | 19 ± 6          | 1.3 ± 0.3        | 18.5 ± 7.0          |
| WGG-5%C15A-170                                                    | 13 ± 3          | 0.7 ± 0.2        | 16.0 ± 4.1          |
| WGG-5%C15A-180                                                    | 8 ± 1           | 0.3 ± 0.1        | 11.9 ± 4.2          |
| WGG-5%C15A-190                                                    | 10 ± 6          | 0.4 ± 0.2        | 11.9 ± 3.4          |

Mechanical properties are given with the average value and standard deviation.

b)

| Mechanical properties of the samples in radial direction (RD) |                 |                  |                     |
|---------------------------------------------------------------|-----------------|------------------|---------------------|
| Sample                                                        | E-modulus (MPa) | Max stress (MPa) | Strain at break (%) |
| WGG-170                                                       | 16 ± 6 g        | 1.1 ± 0.1        | 18.2 ± 7.3          |
| WGG-180                                                       | 22 ± 3 fg       | 1.4 ± 0.2        | 16.0 ± 2.8          |
| WGG-190                                                       | 19 ± 5 fg       | 1.2 ± 0.2        | 16.7 ± 7.3          |
| WGG-5%C15A-170                                                | 10 ± 3 g        | 0.6 ± 0.2        | 16.2 ± 3.8          |
| WGG-5%C15A -180                                               | 6 ± 2 g         | 0.2 ± 0.1        | 9.0 ± 2.9           |
| WGG-5%C15A -190                                               | 9 ± 3 g         | 0.5 ± 0.2        | 14.9 ± 3.2          |

Mechanical properties are given with the average value and standard deviation.

**Table S2.** Glass transition temperature of WGG and WGG-5%C15A composites injection molded at 170, 180 and 190° C.

| Glass transition temperatures of the samples by DSC |                                   |            |
|-----------------------------------------------------|-----------------------------------|------------|
| Sample                                              | Glass transition temperature (°C) |            |
|                                                     | Onset                             | Midpoint   |
| WGG-170                                             | 8.1 (0.9)                         | 31.4 (1.2) |
| WGG-180                                             | 12.6 (4.2)                        | 33.1 (2.2) |
| WGG-190                                             | 11.6 (2.1)                        | 35.7 (1.3) |
| WGG-5%C15A -170                                     | 0.4 (3.6)                         | 25.0 (3.2) |
| WGG-5%C15A -180                                     | 2.8 (1.4)                         | 26.0 (0.9) |
| WGG-5%C15A -190                                     | 3.0 (1.9)                         | 27.8 (1.0) |

The values in parentheses are standard deviations.

**Figure S1.** SAXS patterns of C15A clay composites; (the first Bragg peak from the HCP structure is indicated by arrow).

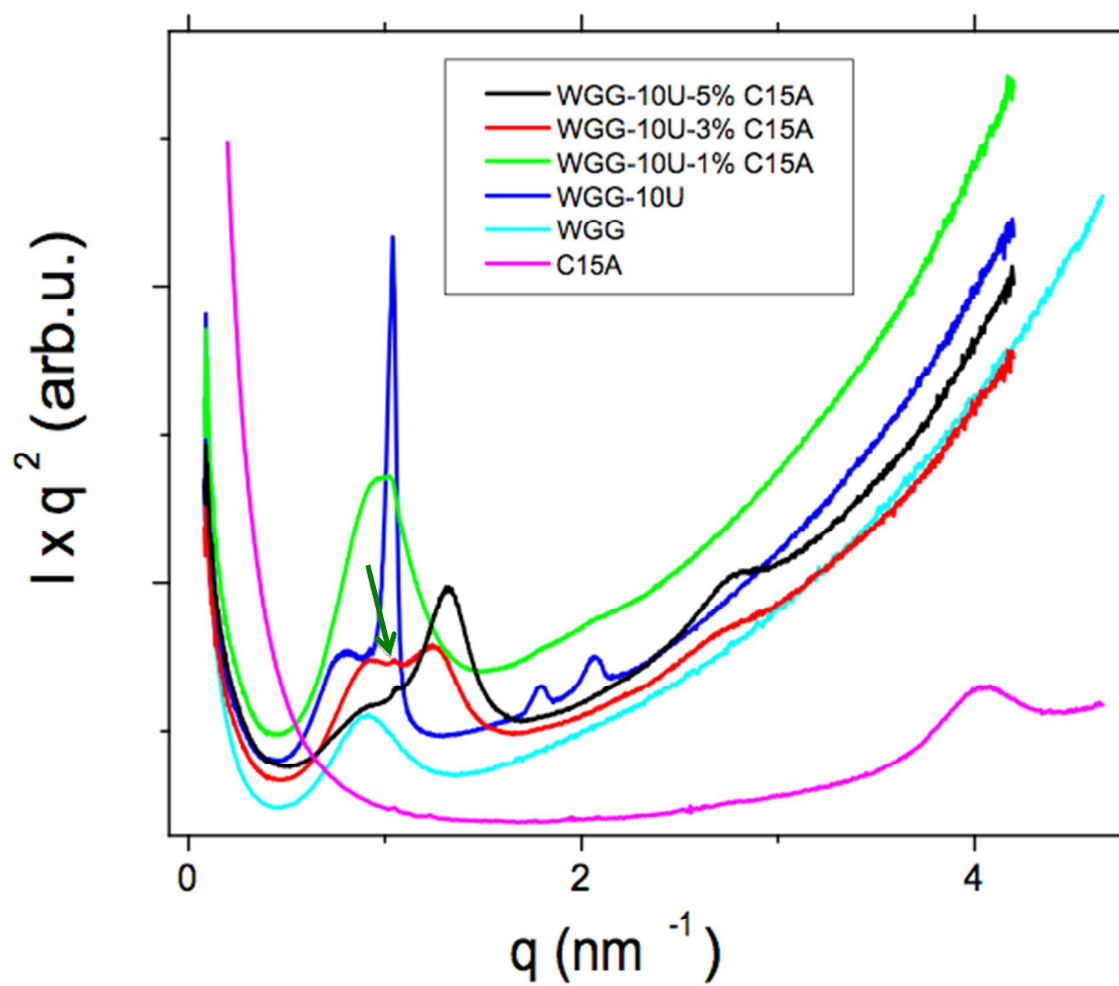

**Figure S2.** WAXS patterns of 1, 3 and 5 wt.% natural MMT and C15A composites.

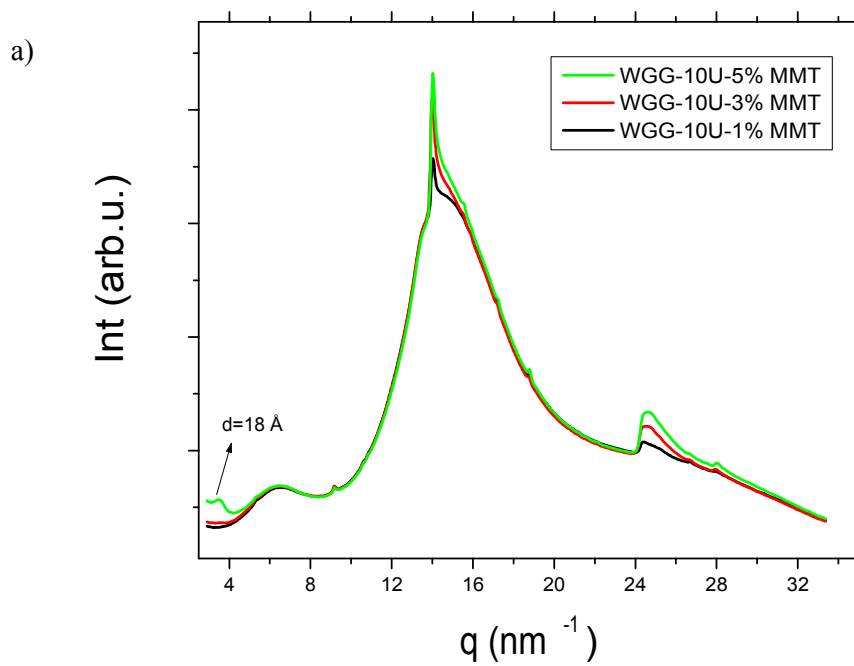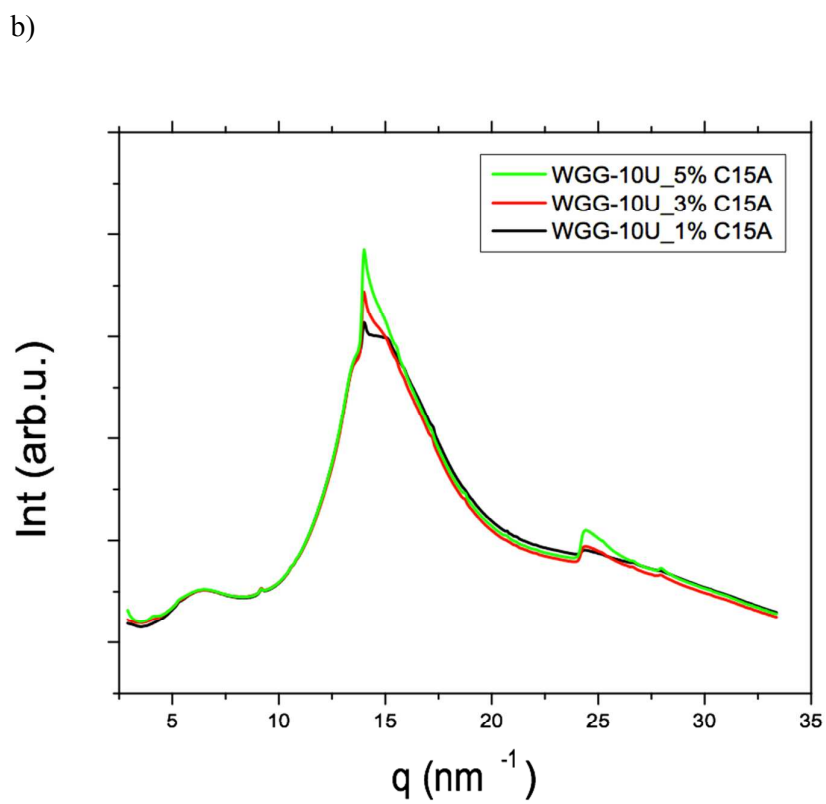

Supplement: Supplementary file 1 [file 3924019]
